# Supplementary material for: SUMO chain formation relies on the amino-terminal region of SUMO-conjugating enzyme and has dedicated substrates in plants
Source: Oxford University Press journal article supplement (doi:10.1042/bcj20170472), 2017-11-14
Supplement: bcj-2017-0472_supp.pdf [file bcj-2017-0472_supp.pdf]

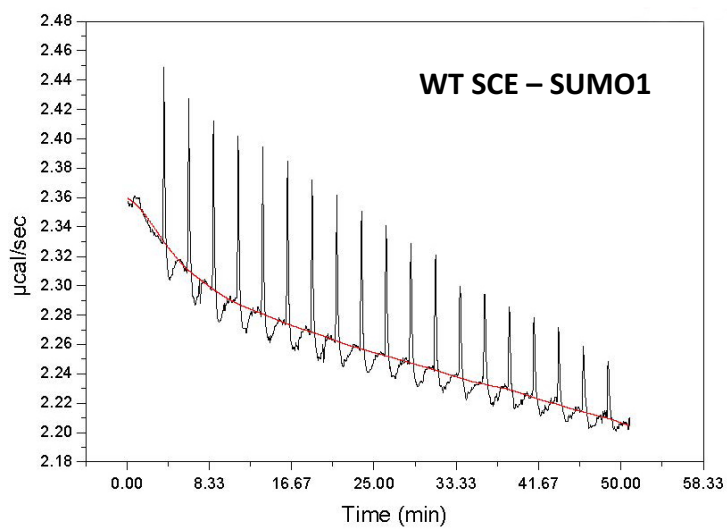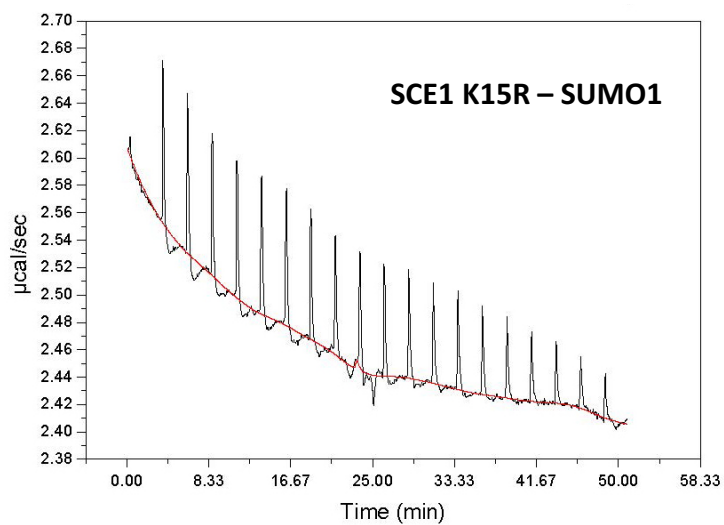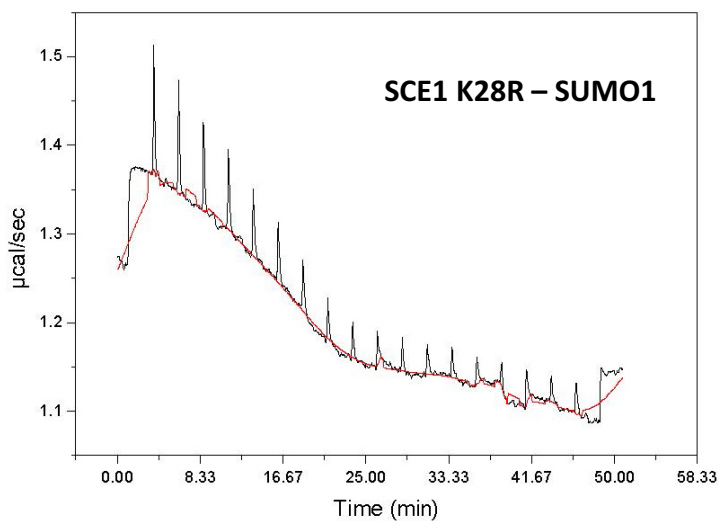

**Supplementary Figure 1.** Data readout of isothermal titration calorimetry. For details, see Materials and Methods section.

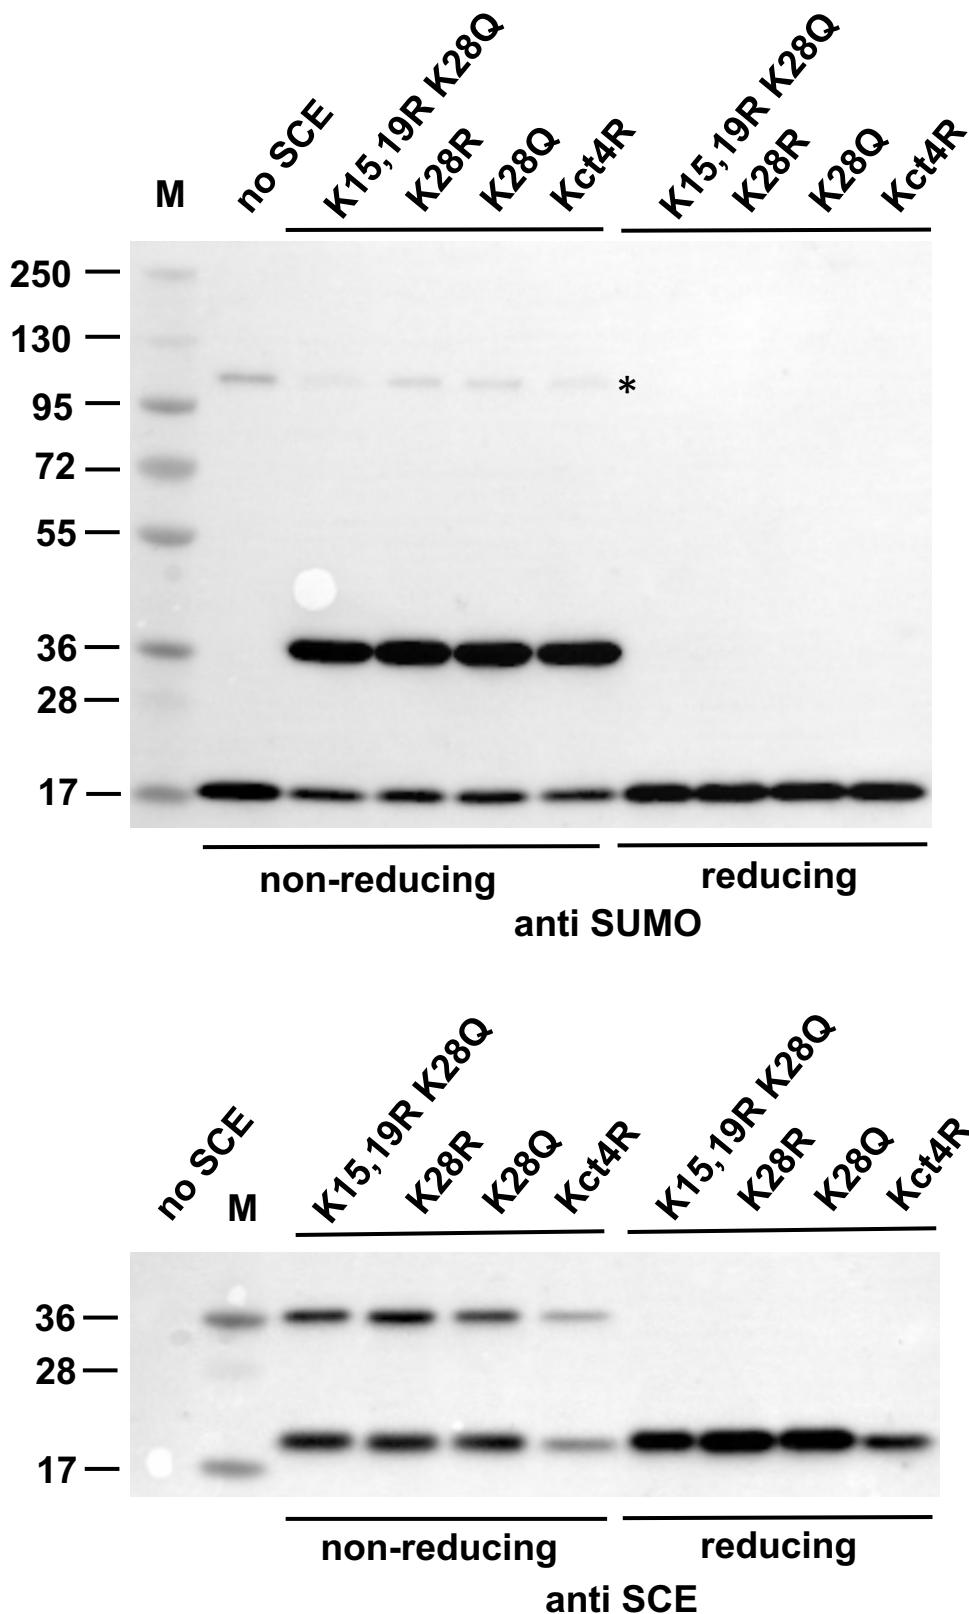

**Supplementary Figure 2.** Thioester formation of SCE variants by transfer of SUMO from SUMO activating enzyme SAE.

5 minute incubations under otherwise identical conditions do not uncover different kinetic parameters for SUMO transfer from SAE to SCE. Kct4R symbolizes SCE mutant with four Lys residues of the carboxyl-terminal end, at positions 146, 147, 150 and 154 replaced by Arg. See also Fig. 6 for more SCE variants. The top band in the top panel (asterisk, non-reduced reactions) is the SAE2-SUMO thioester. The SCE-SUMO thioester band runs at ca. 36 kDa.

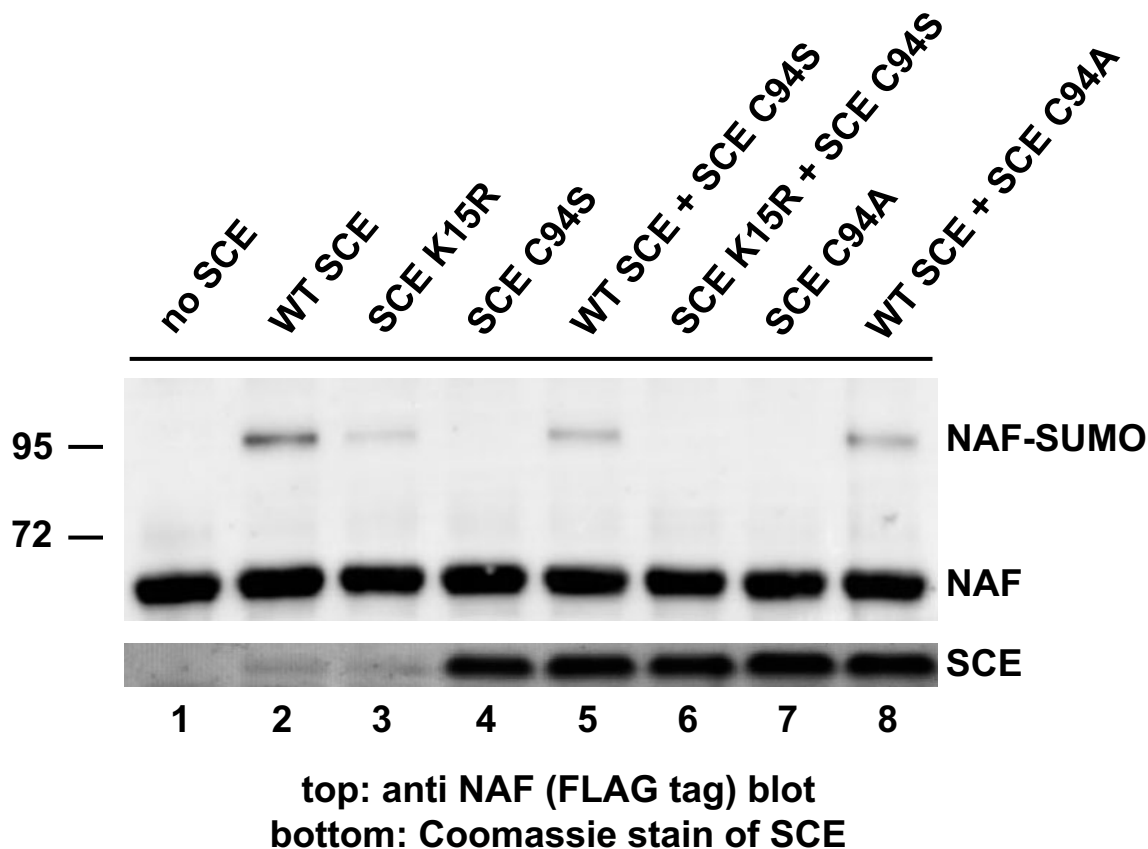

**Supplementary Figure 3.** SUMO conjugation to model substrate NAF by WT and mutant SCE enzymes.

WT SCE and SCE K15R can sumoylate model substrate NAF, whereas the active site mutants SCE C94S and SCE C94A cannot. A ten-fold excess of SCE active site mutant proteins SCE C94S or C95A decreases the activity of WT SCE or SCE K15R. Lines 1 to 4 are identical to those of Figure 1.

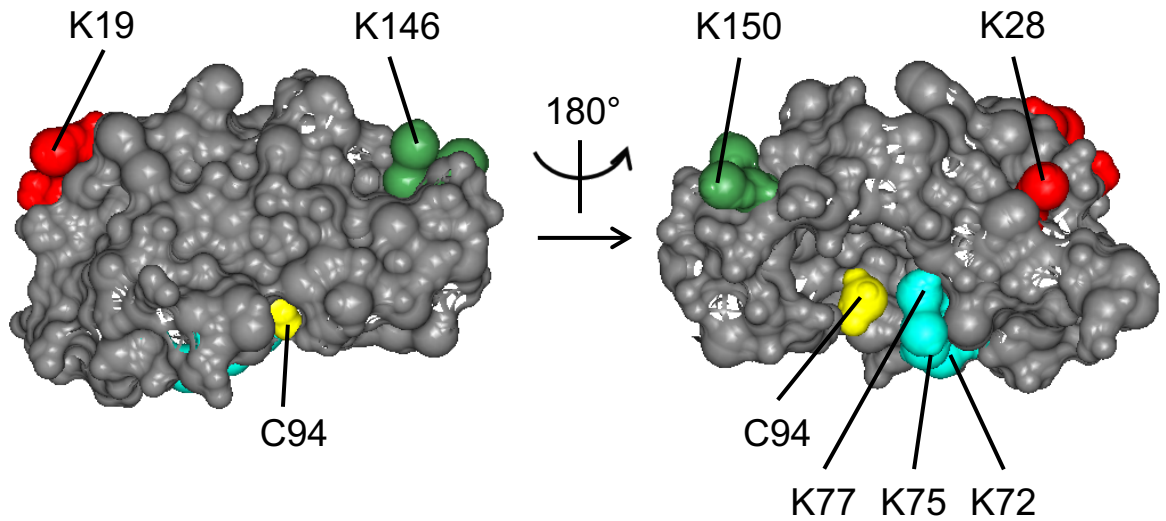

**Supplementary Figure 4.** Arg residues in the vicinity of the active site of Arabidopsis SUMO conjugating enzyme.

In order to confirm loading of the SCE C94S mutant with SUMO by SUMO activating enzyme, Lys residues 72, 75 and 77 were mutated to Arg. This change prevents potential transfer of SUMO from E1 or SCE C94 to the vicinity of the active site. The K72,75,77R mutations did not prevent formation of a SUMO adduct of SCE1 C94S by SUMO activating enzyme, supporting a transfer to Ser in position 94. Red: Lys 15, 19, 28. Green: Lys 146, 147, 150, 154. Turquoise: Lys 72, 75, 77. See also Fig. 2. for legend.

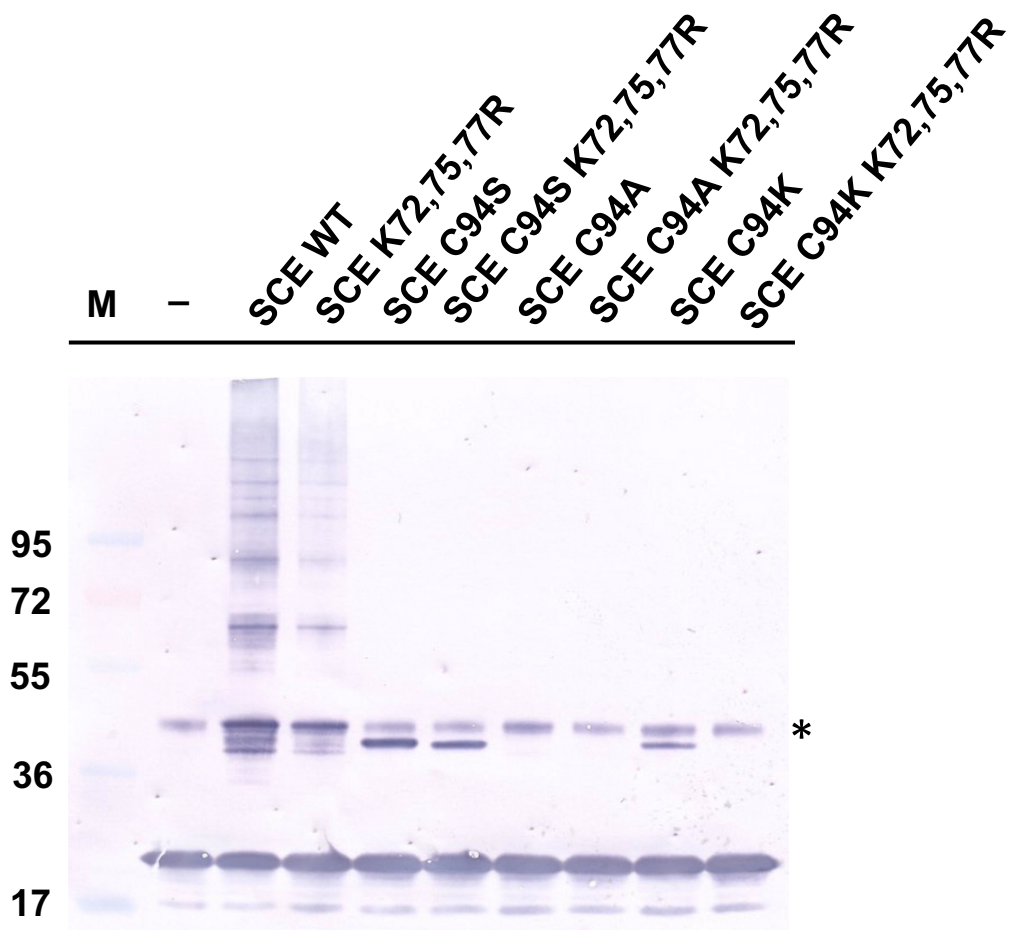

**Supplementary Figure 5.** SUMO conjugated to the active site is not transferred to a nearby Lys residue.

Mutations in the active site Cys residue (C94) abolish activity of SCE, but a replacement by Ser still allows loading with SUMO (see main text). Changing Lys residues K72, K75 and K77, which are adjacent to the active site, to Arg, does not prevent SUMO transfer, indicating that the transfer occurs to the active site Ser, and not to adjacent Lys residues. The asterisk indicates a contaminating protein in the SUMO preparation (also visible in lane -).

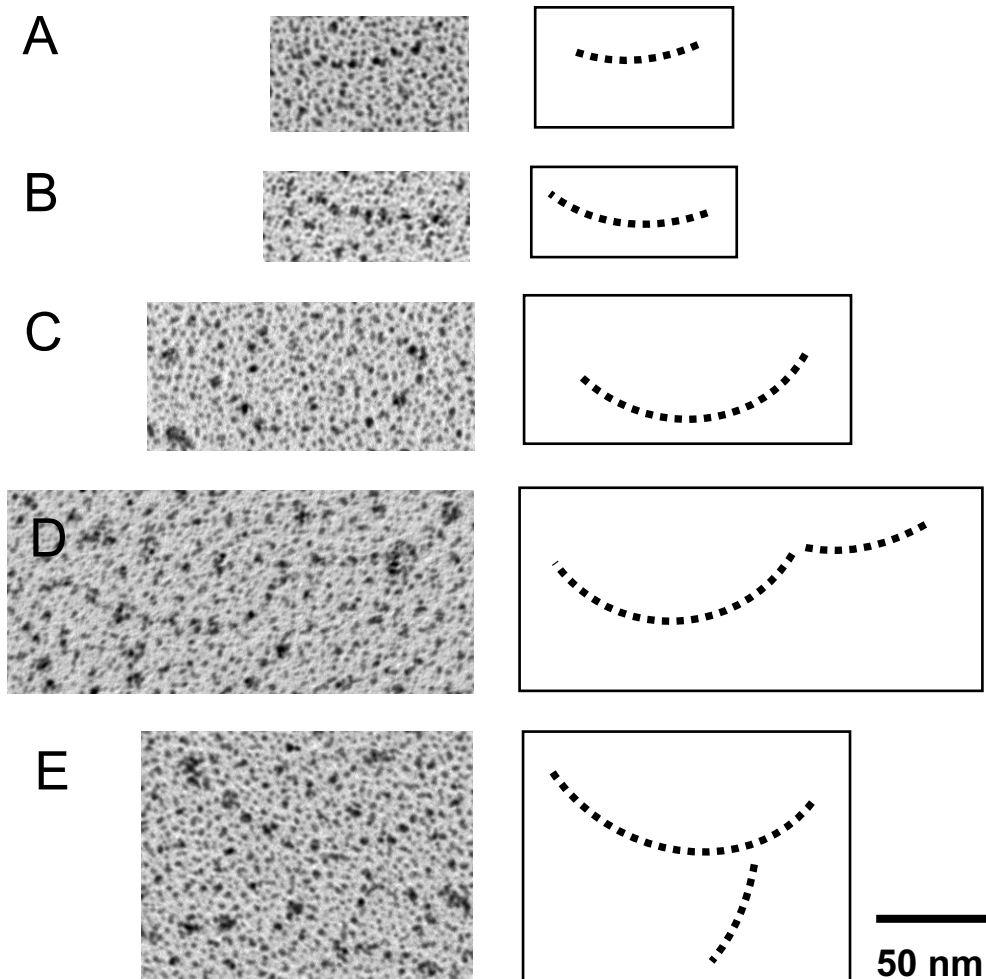

**Supplementary Figure 6.** Electron microscopy images of SUMO chains after rotary shadowing.

SUMO chains were synthesized *in vitro*, spread on gold grids and subjected to rotary shadowing. Interpretation of the images is to the right. Panel E shows the only instance found that might display a branched chain, indicating that branched SUMO chains are rare if existing at all.

**Supplementary Table 1.** Oligonucleotides used in this work

| Name of oligo     | Sequence                                                                       | Use                                                            |
|-------------------|--------------------------------------------------------------------------------|----------------------------------------------------------------|
| 1618-SCE1K15R-fwd | CGT TTA GCT GAA GAG AGG AGA TCG TGG AGG AAG AAT CAT                            | Mutagenesis K15R                                               |
| 1619-SCE1K15R-rev | ATG ATT CTT CCT CCA CGA TCT CCT CTC TTC AGC TAA ACG                            | Mutagenesis K15R                                               |
| 1965-SCE1K19Rfwd  | GAG AGG AGA TCG TGG AGG AGG AAT CAT CCT CAT GGT TTT                            | Mutagenesis K15,19R                                            |
| 1966-SCE1K19Rrev  | AAA ACC ATG AGG ATG ATT CCT CCT CCA CGA TCT CCT CTC                            | Mutagenesis K15,19R                                            |
| 1967-SCE1K28Rfwd  | CCT CAT GGT TTT GTG GCA AGG CCG GAG ACG GGG CAG GAT                            | Mutagenesis K15,19,28R                                         |
| 1968-SCE1K28Rrev  | ATC CTG CCC CGT CTC CGG CCT TGC CAC AAA ACC ATG AGG                            | Mutagenesis K15,19,28R                                         |
| 1969-SCE3K3Rfw    | GAT CCA GTT GAG TAC AGG AGA AGG GTG AGG CTG CAG TCC AGG CAG TAT CCT<br>GCT CTT | Mutagenesis K146,147,150,154R                                  |
| 1970-SCE3K3Rrv    | AAG AGC AGG ATA CTG CCT GGA CTG CAG CCT CAC CCT TCT CCT GTA CTC AAC<br>TGG ATC | Mutagenesis K146,147,150,154R                                  |
| 1971-SCE1C94Afw   | TAT CCA TCT GGA ACT GTC GCT CTC TCT ATC CTT AAC GAG                            | Mutagenesis C94A                                               |
| 1972-SCE1C94Arv   | CTC GTT AAG GAT AGA GAG AGC GAC AGT TCC AGA TGG ATA                            | Mutagenesis C94A                                               |
| 1979-SCE1C94Kfw   | TAT CCA TCT GGA ACT GTC AAA CTC TCT ATC CTT AAC GAG                            | Mutagenesis C94K                                               |
| 1980-SCE1C94Krev  | CTC GTT AAG GAT AGA GAG TTT GAC AGT TCC AGA TGG ATA                            | Mutagenesis C94K                                               |
| 2028-SCE1K28Qfwl  | CAT CCT CAT GGT TTT GTG GCA CAG CCG GAG ACG GGG CAG GAT GG                     | Mutagenesis K28Q                                               |
| 2029-SCE1K28Qrvl  | CCA TCC TGC CCC GTC TCC GGC TGT GCC ACA AAA CCA TGA GGA TG                     | Mutagenesis K28Q                                               |
| 2032-SCE1K28Rf2   | CAT CCT CAT GGT TTT GTG GCA AGG CCG GAG ACG GGG CAG GAT GG                     | Mutagenesis K28R                                               |
| 2033-SCE1L28Rr2   | CCA TCC TGC CCC GTC TCC GGC CTT GCC ACA AAA CCA TGA GGA TG                     | Mutagenesis K28R                                               |
| 1656-SCEgdn1      | CCC GCC CTC GAG TGA CCT GCA AAA ACT GCT TCC                                    | genomic amplification                                          |
| 1657-SCEgup1      | CCC GCC ACT AGT GAA ATA TAT GTA TTT CTA GAT TCA C                              | genomic amplification                                          |
| 1757-SCEtermup2   | TCC AAG CTT TCT ATC TCA ATC                                                    | detection of genomic SCE1                                      |
| 1711-SCE889-914   | ACG ATA CTC CGA TTA CCC TTC TAA AG                                             | detection of genomic SCE1 and<br>T-DNA insert in <i>sce5-1</i> |
| Salk LBa1         | TGG TTC ACG TAG TGG GCC ATC G                                                  | detection of T-DNA insert in SCE                               |
| 1456-BAR_F        | AGA AAC CCA CGT CAT GCC AGT TC                                                 | detection of T-DNA construct                                   |
| 1619-SCE1K15R-rev | ATG ATT CTT CCT CCA CGA TCT CCT CTC TTC AGC TAA ACG                            | detection of T-DNA construct                                   |
